# Supplementary material for: Predictive Value of Immune Genomic Signatures from Breast Cancer Cohorts Containing Data for Both Response to Neoadjuvant Chemotherapy and Prognosis after Surgery
Source: Research Square preprint supplement (doi:10.21203/rs.3.rs-1007296/v2), 2021-12-29
Supplement: Supplementary file 2 [file e3a15f4ea3348c71f7134fe1.xlsx]

## Sheet: Table 1
Table1 Patients characteristics
Age, years
Average (min-max)	49.9	(24-75)
Clinical Pathological covariates	No. of Patients	%
Hormone receptor
Postive	306	63.0928
Negative	179	36.9072
Estrogen receptor
Postive	289	59.5876
Negative	195	40.2062
NA	1	0.206186
Progesterone receptor
Postive	233	48.0412
Negative	250	51.5464
NA	2	0.412371
T stage
0-2	279	57.5258
3/4	206	42.4742
Number of Lymph node metastasis
0	151	31.134
1-3	334	68.866
Histological grade
1	31	6.39175
2	187	38.5567
3	250	51.5464
NA	17	3.50515
Molecular subtypes
Luminal A	153	31.5464
Luminal B	75	15.4639
HER2	35	7.21649
basal	179	36.9072
normal	43	8.86598
Neoadjuvant outcome
Pathological complete response	93	19.1753
Residual disease	373	76.9072
NA	19	3.91753
5-year relapse-free survival
Relapse	379	78.1443
non-relapse	106	21.8557

## Sheet: Table 2
Table2 Cox proportional hazards analysis of five immune-related gene signatures for 5-year distant relapse-free survival*
		Univariate analysis				Multivariate analysis**
(A) All (n=485)
		Hazard ratio	95%CI	P value		Hazard ratio	95%CI	P value
Ascierto
low		0.577	0.35-0.94	0.0284		0.66	0.33-1.33	0.246
intermediate		0.92	0.59-1.43	0.708		0.849	0.46-1.57	0.599
high (reference)
Schmidt
low		0.824	0.52-1.30	0.403		0.911	0.47-1.77	0.782
intermediate		0.777	0.49-1.24	0.293		0.793	0.42-1.49	0.471
high (reference)
Bianchini
low		0.899	0.56-1.44	0.654		1.074	0.54-2.13	0.839
intermediate		0.915	0.57-1.46	0.708		1.105	0.59-2.06	0.753
high (reference)
TILsGS
low		0.281	0.16-0.48	<0.001		0.544	0.27-1.11	0.093
intermediate		0.658	0.43-1.00	0.052		0.656	0.35-1.23	0.186
high (reference)
IRSN-23
low		0.42	0.25-0.69	<0.001		0.459	0.22-0.94	0.033
intermediate		0.728	0.47-1.12	0.151		0.865	0.49-1.54	0.624
high (reference)
(B) Hormone receptor positive (n=306)
		Hazard ratio	95%CI	P value		Hazard ratio	95%CI	P value
Ascierto
low		0.745	0.36-1.54	0.425		0.997	0.48-2.09	0.994
intermediate		0.697	0.32-1.50	0.358		0.699	0.32-1.52	0.367
high (reference)
Schmit
low		0.886	0.43-1.82	0.743		1.137	0.53-2.43	0.739
intermediate		0.812	0.38-1.75	0.596		0.867	0.40-1.89	0.718
high (reference)
Bianchini
low		0.884	0.42-1.85	0.745		1.149	0.52-2.51	0.729
intermediate		0.802	0.37-1.74	0.576		0.882	0.40-1.93	0.754
high (reference)
TILsGS
low		0.358	0.17-0.78	0.009		0.402	0.18-0.89	0.025
intermediate		0.666	0.32-1.37	0.27		0.628	0.30-1.31	0.214
high (reference)
IRSN-23
low		0.319	0.14-0.72	0.006		0.394	0.17-0.93	0.034
intermediate		0.768	0.39-1.51	0.443		0.815	0.41-1.62	0.56
high (reference)
(C) Hormone receptor negative (n=179)
		Hazard ratio	95%CI	P value		Hazard ratio	95%CI	P value
Ascierto
low		0.765	0.36-1.62	0.484		0.799	0.36-1.76	0.576
intermediate		1.518	0.89-2.59	0.126		1.496	0.87-2.59	0.15
high (reference)
Schmit
low		1.257	0.69-2.28	0.452		1.14	0.59-2.19	0.694
intermediate		1	0.55-1.82	1		1.088	0.58-2.04	0.792
high (reference)
Bianchini
low		1.464	0.79-2.71	0.226		1.357	0.69-2.67	0.376
intermediate		1.358	0.76-2.44	0.305		1.527	0.82-2.83	0.179
high (reference)
TILsGS
low		0.512	0.20-1.30	0.16		0.617	0.24-1.60	0.322
intermediate		0.94	0.55-1.61	0.821		0.842	0.49-1.46	0.538
high (reference)
IRSN-23
low		0.803	0.43-1.52	0.499		0.746	0.39-1.44	0.381
intermediate		0.897	0.51-1.59	0.711		0.776	0.42-1.42	0.411
high (reference)
* CI: confidence interval. "hgih"
** Adjusted covariates were age, nodal status (1-3 vs. 0), tumor stage (3,4 vs. 0-2), estrogen receptor status (negative vs. positive) only in all cases and Ki67 (low vs. intermediate vs. high ).

## Sheet: Table 3
Table3 Logistic progression analysis of five immune-related gene signatures for pCR*
		(A) Univariate analysis				Multivariate analysis**
(A) All (n=485)
		Odds ratio	95%CI	P value		Odds ratio	95%CI	P value
Ascierto
low		0.363	0.20-0.63	<0.001		0.854	0.37-1.96	0.078
intermediate		0.382	0.22-0.66	<0.001		0.47	0.20-1.07	0.554
high (reference)
Schmit
low		0.4	0.25-0.76	0.004		2.366	0.58-3.32	0.183
intermediate		0.46	0.27-0.81	0.007		0.57	0.24-1.29	0.52
high (reference)
Bianchini
low		0.43	0.24-0.75	0.003		1.228	0.51-2.96	0.645
intermediate		0.459	0.26-0.79	0.005		0.59	0.26-1.31	0.198
high (reference)
TILsGS
low		0.212	0.11-0.39	<0.001		0.506	0.19-1.28	0.788
intermediate		0.484	0.28-0.81	0.007		0.899	0.41-1.94	0.565
high (reference)
IRSN-23
low		0.817	0.47-1.43	0.479		1.876	0.80-4.49	0.151
intermediate		0.909	0.52-1.58	0.734		1.426	0.63-3.25	0.392
high (reference)
(B) Hormone receptor positive (n=306)
		Odds ratio	95%CI	P value		Odds ratio	95%CI	P value
Ascierto
low		0.268	0.11-0.61	0.002		0.274	0.11-0.67	0.005
intermediate		0.258	0.10-0.62	0.003		0.217	0.08-0.56	0.002
high (reference)
Schmit
low		0.345	0.14-0.80	0.014		0.309	0.12-0.77	0.013
intermediate		0.397	0.15-0.46	0.034		0.357	0.14-0.88	0.028
high (reference)
Bianchini
low		0.34	0.14-0.80	0.014		0.276	0.10-0.71	0.009
intermediate		0.4	0.17-0.93	0.034		0.313	0.12-0.78	0.015
high (reference)
TILsGS
low		0.253	0.10-0.60	0.002		0.418	0.16-1.08	0.019
intermediate		0.392	0.16-0.92	0.032		0.332	0.13-0.82	0.566
high (reference)
IRSN-23
low		0.757	0.32-1.82	0.527		1.43	0.56-3.73	0.457
intermediate		0.8	0.33-1.95	0.618		1.082	0.43-2.77	0.867
high (reference)
(C) Hormone receptor negative (n=179)
		Odds ratio	95%CI	P value		Odds ratio	95%CI	P value
Ascierto
low		0.945	0.40-2.16	0.895		1.035	0.42-2.52	0.94
intermediate		0.65	0.30-1.35	0.257		0.747	0.34-1.62	0.46
high (reference)
Schmit
low		0.907	0.40-2.00	0.811		1.081	0.44-2.65	0.401
intermediate		0.691	0.32-1.46	0.338		0.711	0.32-1.57	0.115
high (reference)
Bianchini
low		0.883	0.39-1.96	0.762		1.08	0.43-2.71	0.869
intermediate		0.665	0.31-1.39	0.285		0.694	0.31-1.52	0.363
high (reference)
TILsGS
low		0.421	0.10-0.60	0.149		0.39	0.10-1.20	0.125
intermediate		0.778	0.16-0.92	0.481		0.899	0.43-1.87	0.776
high (reference)
IRSN-23
low		1.51	0.68-3.35	0.31		1.948	0.83-4.64	0.127
intermediate		1.372	0.65-2.91	0.408		1.636	0.74-3.62	0.221
high (reference)
* pCR: pathological complete response; CI: confidence interval.
** Adjusted covariates were age, nodal status (1-3 vs. 0), tumor stage (3,4 vs. 0-2), estrogen receptor status (negative vs. positive) only in all cases and Ki67 (low vs. intermediate vs. high ).
