# Supplementary material for: Predictive Value of Immune Genomic Signatures from Breast Cancer Cohorts Containing Data for Both Response to Neoadjuvant Chemotherapy and Prognosis after Surgery
Source: Research Square preprint supplement (doi:10.21203/rs.3.rs-1007296/v2), 2021-12-29
Supplement: Supplementary file 3 [file fe25338642ecc387904aee05.xlsx]

## Sheet: Sup. table 1
Sup. table 1 List of genes for Immune Genomic Siagatures
TILsGS			Ascierto			Bianchini			Schmidt			IRSN-23
ProbeSet	Symbol		ProbeSet	Symbol		ProbeSet	Symbol		ProbeSet	Symbol		ProbeSet	Symbol
200629_at	WARS		200887_s_at	STAT1		209138_x_at	IGL@		205267_at	POU2AF1		220162_s_at	CARD9
201762_s_at	PSME2		202269_x_at	GBP1		209374_s_at	IGHM		205692_s_at	CD38		210029_at	IDO1
201930_at	MCM6		209925_at	OCLN		211430_s_at	IGHG3		209138_x_at	IGLC1		203915_at	CXCL9
203416_at	CD53		214669_x_at	IGKC		211634_x_at	IGHV1-69		209374_s_at	IGHM		201695_s_at	PNP
204170_s_at	CKS2		NA	IGLL5		211635_x_at	IGHV1-69		211430_s_at	NA		211122_s_at	CXCL11
204563_at	SELL					211637_x_at	LOC652128		211633_x_at	IGHG1		212501_at	CEBPB
204822_at	TTK					211641_x_at	IGHG3		211634_x_at	NA		204440_at	CD83
204891_s_at	LCK					211643_x_at	IGKC		211635_x_at	NA		204864_s_at	IL6ST
205255_x_at	TCF7					211644_x_at	IGKC		211637_x_at	NA		205898_at	CX3CR1
205569_at	LAMP3					211645_x_at	IGKC		211641_x_at	NA		205789_at	CD1D
205671_s_at	HLA-DOB					211798_x_at	IGLJ3		211643_x_at	NA		201487_at	CTSC
205798_at	IL7R					212592_at	IGJ		211644_x_at	NA		204533_at	CXCL10
207551_s_at	MSL3					214669_x_at	IGKC		211645_x_at	NA		216541_x_at	IGHG1
208687_x_at	HSPA8					214677_x_at	IGLJ3		211650_x_at	NA		211000_s_at	IL6ST
208778_s_at	TCP1					214768_x_at	IGKC		211798_x_at	IGLJ3		212758_s_at	ZEB1
208864_s_at	TXN					214777_at	IGKC		211868_x_at	NA		210512_s_at	VEGFA
208885_at	LCP1					214836_x_at	IGKC		211881_x_at	IGLJ3		203788_s_at	SEMA3C
210029_at	IDO1					214916_x_at	IL8		211908_x_at	IGK		205544_s_at	CR2
210439_at	ICOS					214973_x_at	IGHG3		212311_at	SEL1L3		204863_s_at	IL6ST
210821_x_at	CENPA					215121_x_at	IGL@		212314_at	SEL1L3		211331_x_at	HFE
212314_at	SEL1L3					215176_x_at	NTN2L		212592_at	JCHAIN		206217_at	EDA
212718_at	PAPOLA					215379_x_at	IGL@		213502_x_at	GUSBP11		210875_s_at	ZEB1
						215946_x_at	CTA-246H3.1		214669_x_at	IGKC		210163_at	CXCL11
						216207_x_at	IGKV1D-13		214677_x_at	NA
						216401_x_at	NA		214768_x_at	IGKC
						216557_x_at	IFI6		214777_at	IGKC
						216576_x_at	NTN2L		214836_x_at	NA
						216984_x_at	IGL@		214916_x_at	NA
						217022_s_at	IGHA1		214973_x_at	IGHD
						217148_x_at	IGL@		215118_s_at	IGH
						217157_x_at	IGKC		215121_x_at	NA
						217179_x_at	IGL@		215176_x_at	NA
						217227_x_at	IL8		215214_at	IGLC1
						217235_x_at	IGL@		215379_x_at	NA
						217378_x_at	IGKV1OR2-108		215946_x_at	IGLL3P
						217480_x_at	IGKV1OR15-118		215949_x_at	NA
						221651_x_at	IGKC		216207_x_at	NA
						221671_x_at	IGKC		216365_x_at	NA
									216401_x_at	NA
									216412_x_at	NA
									216491_x_at	IGHM
									216510_x_at	NA
									216542_x_at	NA
									216557_x_at	NA
									216560_x_at	IGLC1
									216576_x_at	NA
									216984_x_at	NA
									217022_s_at	NA
									217148_x_at	NA
									217157_x_at	NA
									217179_x_at	NA
									217227_x_at	IGLV1-44
									217235_x_at	NA
									217236_x_at	NA
									217258_x_at	IGLV1-44
									217281_x_at	NA
									217378_x_at	NA
									217480_x_at	NA
									221286_s_at	MZB1
